# Supplementary material
Source: publisher figshare collection journal article supplement (https://tandf.figshare.com/articles/dataset/_/7210181)
Supplement: Supplementary file 1 [file 1]

**Table S1.** Summary statistics for SSR data. PIC is polymorphism information content1. Obs. is the number of observations. Availability is the number observations divided by the number of samples.

| Marker | Major allele frequency | Genotype# | Obs. | # alleles | Availability | HE | HO | PIC |
| --- | --- | --- | --- | --- | --- | --- | --- | --- |
| *notssr*2 | 0.7647 | 12 | 340 | 7 | 0.9659 | 0.3781 | 0.3235 | 0.3345 |
| *notssr*8 | 0.6203 | 25 | 266 | 9 | 0.7557 | 0.5757 | 0.5338 | 0.5444 |
| *notssr*26 | 0.2930 | 46 | 340 | 16 | 0.8920 | 0.7953 | 0.4713 | 0.7673 |
| *notssr*13 | 0.6764 | 16 | 343 | 6 | 0.9744 | 0.5113 | 0.4548 | 0.4821 |
| *notssr*36 | 0.3536 | 16 | 338 | 6 | 0.9602 | 0.7315 | 0.5059 | 0.6840 |
| *notssr*6 | 0.6181 | 14 | 271 | 6 | 0.7699 | 0.5558 | 0.4465 | 0.5063 |
| *Ncu*13 | 0.9517 | 4 | 352 | 3 | 1.0000 | 0.0921 | 0.0909 | 0.0881 |
| *notssr*22 | 0.9236 | 6 | 347 | 3 | 0.9858 | 0.1439 | 0.1153 | 0.1388 |
| *notssr*18 | 0.6160 | 23 | 349 | 8 | 0.9915 | 0.5845 | 0.5559 | 0.5564 |
| *BC*9 | 0.1905 | 60 | 294 | 16 | 0.8352 | 0.8773 | 0.8299 | 0.8649 |
| Mean | 0.6008 | 22 | 321 | 8 | 0.9131 | 0.5245 | 0.4328 | 0.4967 |

1Botstein D, White RL, Skolnick M, Davis RW. 1980. Construction of a genetic linkage map in man using restriction fragment length polymorphisms. American Journal of Human Genetics 32: 314–331.
