# Supplementary material
Source: publisher figshare collection journal article supplement (https://tandf.figshare.com/articles/dataset/_/7210181)
Supplement: Supplementary file 1 [file 1]

CLUMPAK main pipeline - Job 1535428866 summary

Major modes for the uploaded data:

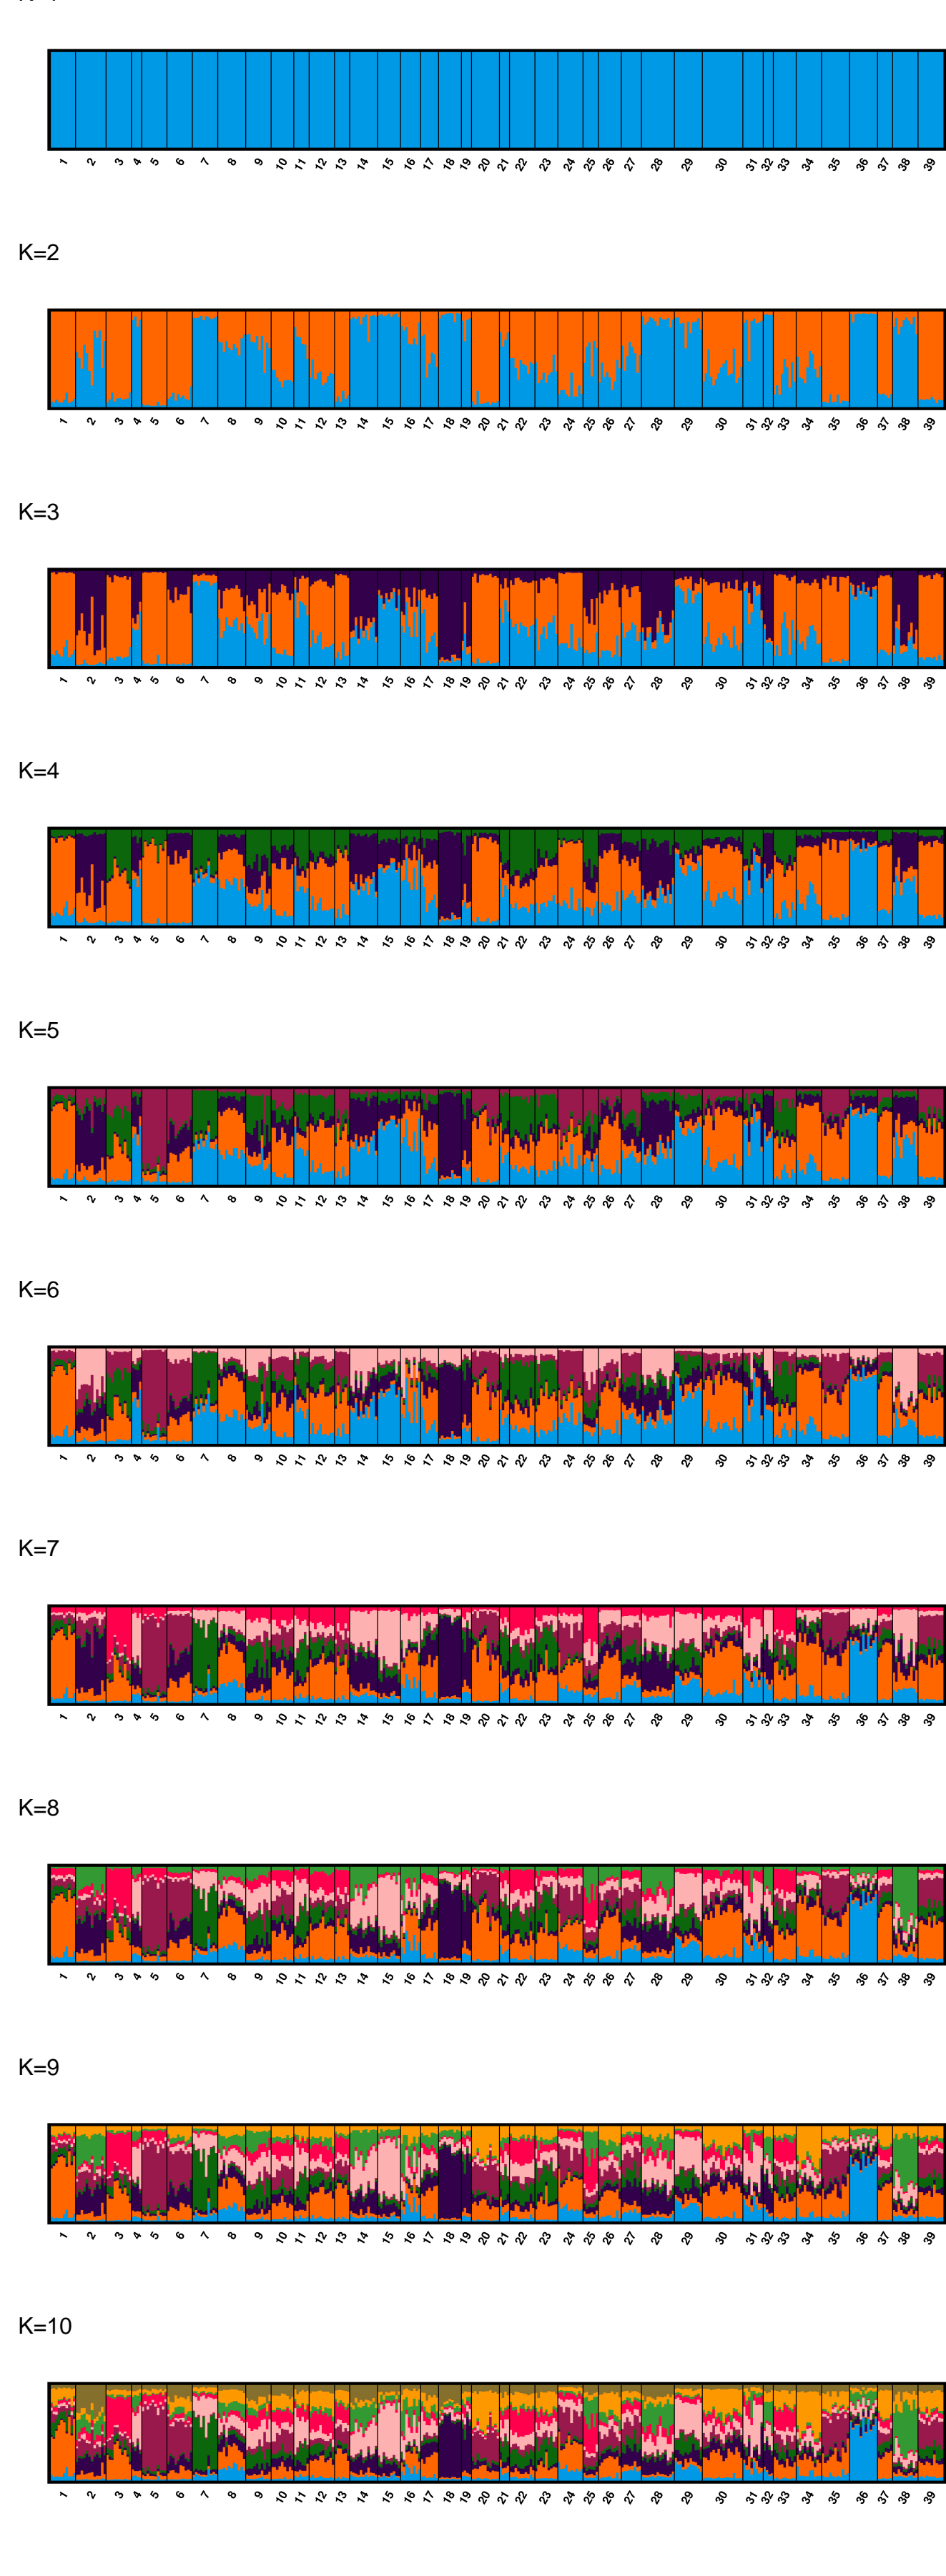

Minor modes for the uploaded data:

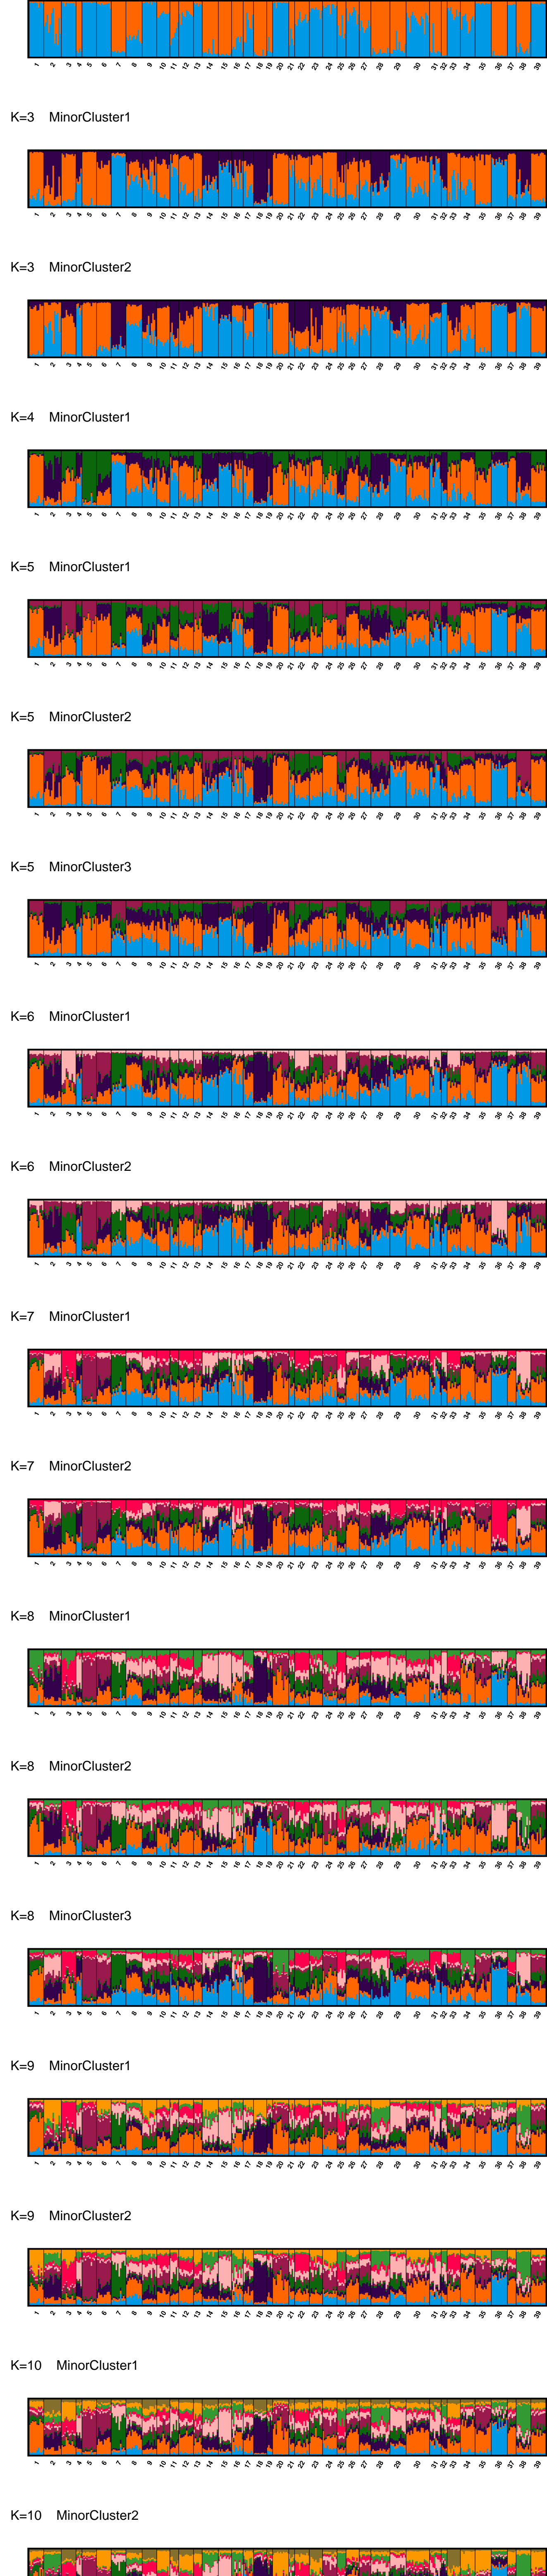

Division of runs by mode:

- K=1 20/20
- K=2 19/20, 1/20
- K=3 12/20, 6/20, 2/20
- K=4 15/20, 5/20
- K=5 16/20, 2/20, 1/20, 1/20
- K=6 11/20, 7/20, 2/20
- K=7 11/20, 7/20, 2/20
- K=8 15/20, 3/20, 1/20, 1/20
- K=9 7/20, 7/20, 6/20
- K=10 16/20, 3/20, 1/20
