# Supplementary material
Source: publisher figshare collection journal article supplement (https://tandf.figshare.com/articles/dataset/_/7210181)
Supplement: Supplementary file 2 [file 1]

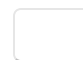

## Job wispy-lake-f523

This output file was generated at:

2018-Sep-17 19:21:25 PDT

**This document is not permanent.** It will automatically be removed from the server in seven (7) days. Please save or print it for your records. If images are missing, try reloading; this sometimes happens under heavy server load.

Single file archive including this page, all images, all clumpp files: [download](#). [.tar.gz]

### L(K)

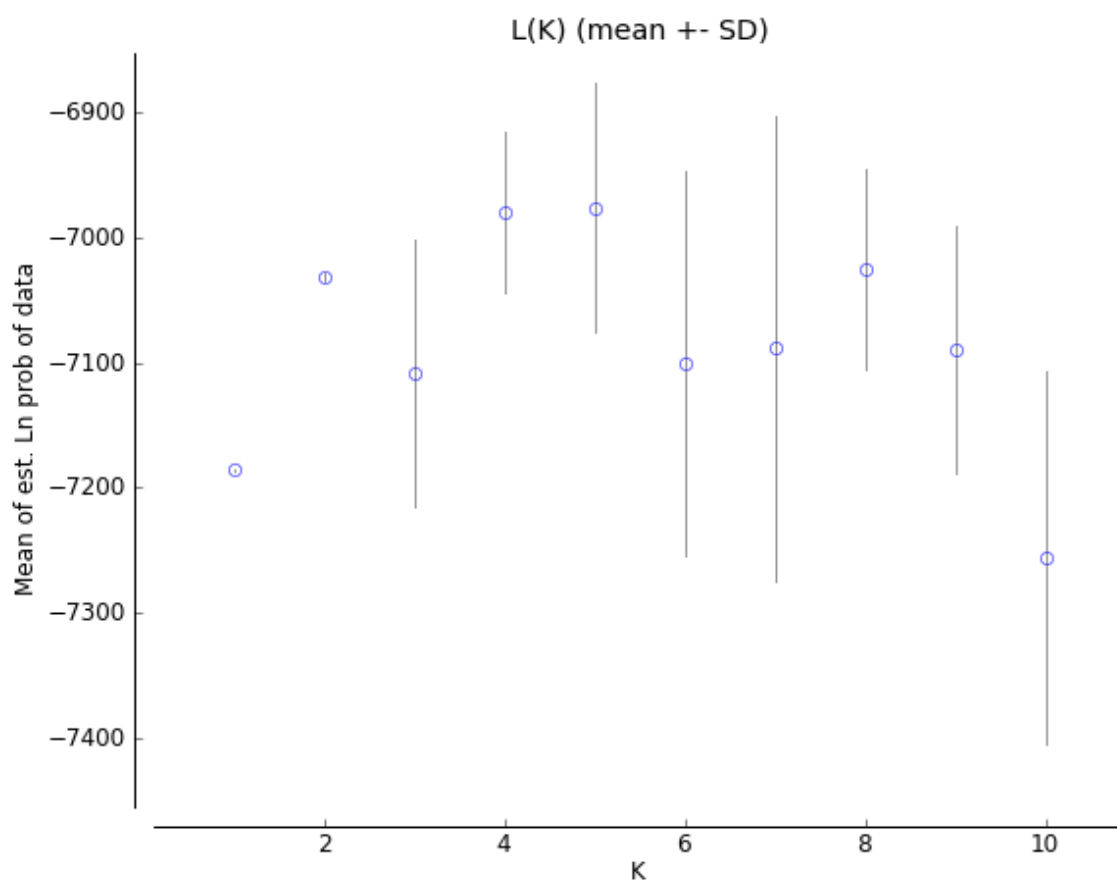

L(K): [pdf](#) [eps](#)

### Clumpp files

[K = 1 Clumpp indfile](#) [K = 1 Clumpp popfile](#)

[K = 2 Clumpp indfile](#) [K = 2 Clumpp popfile](#)

[K = 3 Clumpp indfile](#) [K = 3 Clumpp popfile](#)

[K = 4 Clumpp indfile](#) [K = 4 Clumpp popfile](#)

[K = 5 Clumpp indfile](#)   [K = 5 Clumpp popfile](#)  
[K = 6 Clumpp indfile](#)   [K = 6 Clumpp popfile](#)  
[K = 7 Clumpp indfile](#)   [K = 7 Clumpp popfile](#)  
[K = 8 Clumpp indfile](#)   [K = 8 Clumpp popfile](#)  
[K = 9 Clumpp indfile](#)   [K = 9 Clumpp popfile](#)  
[K = 10 Clumpp indfile](#)   [K = 10 Clumpp popfile](#)

---

## Evanno method

\*[Evanno et al., 2005. Molecular Ecology 14, 2611 - 2620](#). How are we calculating this? Look at the [FAQ](#).

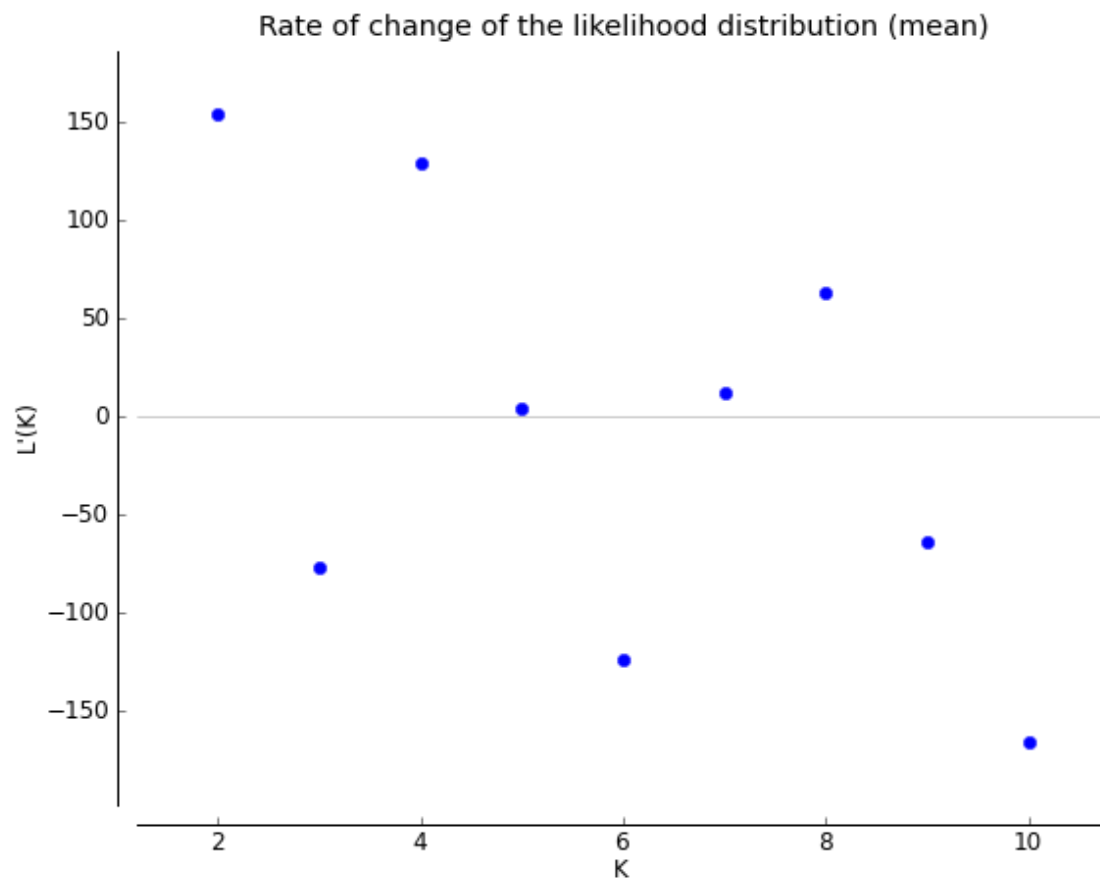

$L'(K)$ : [pdf](#) [eps](#)

---

Absolute value of the 2nd order rate of change of the likelihood distribution (mean)

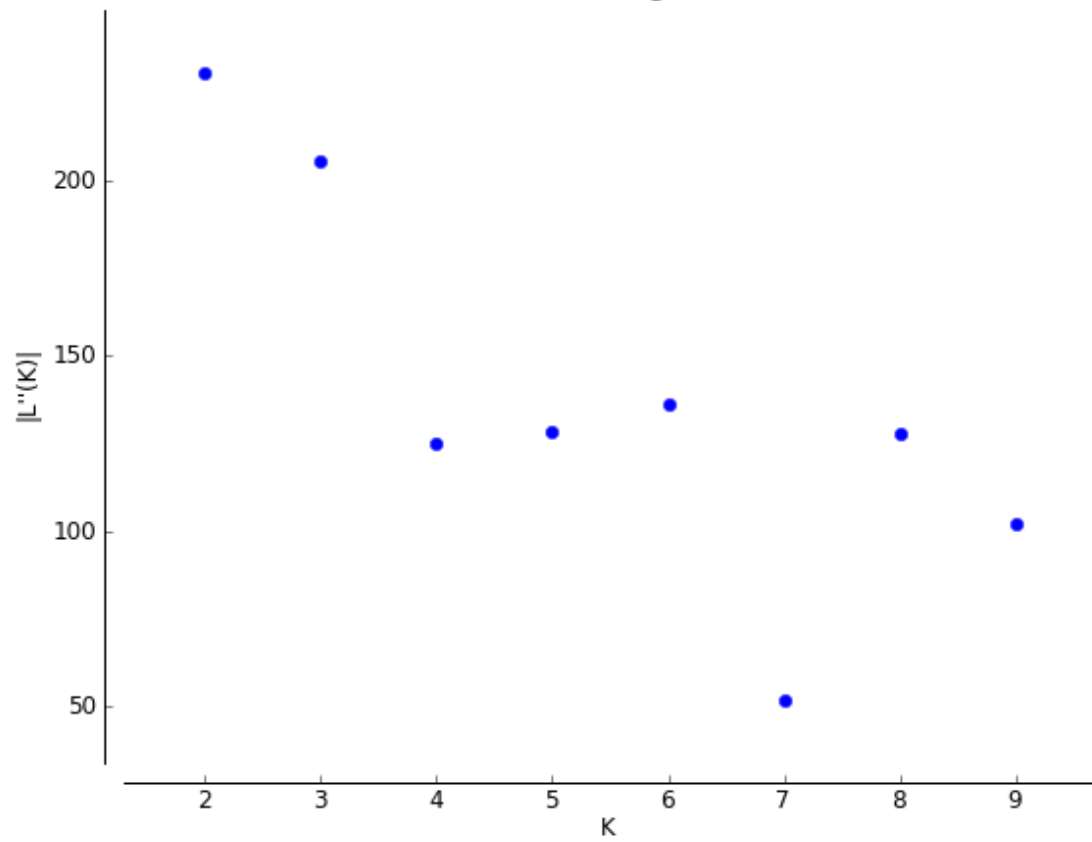

$|L''(K)|$ : [pdf](#) [eps](#)

---

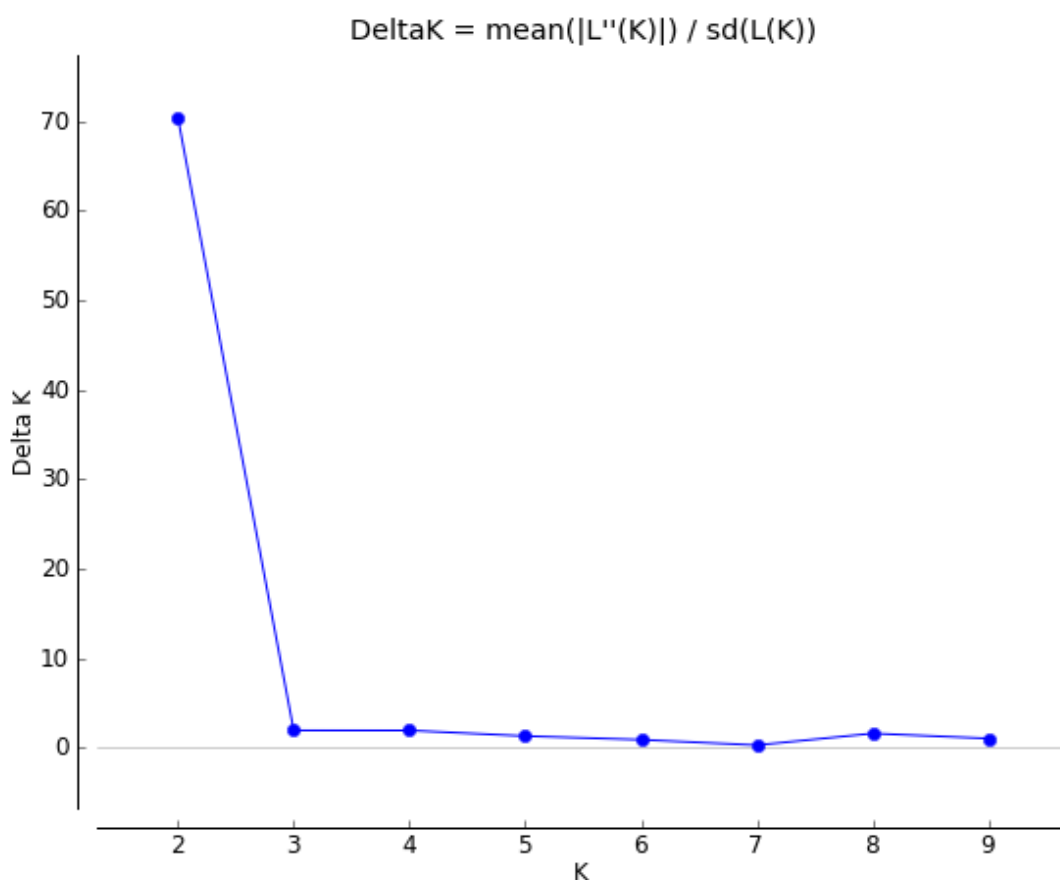

Delta K: [pdf](#) [eps](#)

The Evanno table output is also available as a tab-delimited text file (for use with Excel) [here](#).

| K  | Reps | Mean LnP(K)  | Stdev LnP(K) | Ln'(K)      | Ln''(K)    | Delta K   |
|----|------|--------------|--------------|-------------|------------|-----------|
| 1  | 20   | -7185.830000 | 0.238636     | —           | —          | —         |
| 2  | 20   | -7031.690000 | 3.281832     | 154.140000  | 230.995000 | 70.385992 |
| 3  | 20   | -7108.545000 | 106.496229   | -76.855000  | 205.910000 | 1.933496  |
| 4  | 20   | -6979.490000 | 65.073981    | 129.055000  | 125.170000 | 1.923503  |
| 5  | 20   | -6975.605000 | 99.063502    | 3.885000    | 128.280000 | 1.294927  |
| 6  | 20   | -7100.000000 | 153.622589   | -124.395000 | 136.170000 | 0.886393  |
| 7  | 20   | -7088.225000 | 185.705584   | 11.775000   | 51.530000  | 0.277482  |
| 8  | 20   | -7024.920000 | 80.588602    | 63.305000   | 127.940000 | 1.587569  |
| 9  | 20   | -7089.555000 | 99.165181    | -64.635000  | 101.735000 | 1.025915  |
| 10 | 20   | -7255.925000 | 149.087176   | -166.370000 | —          | —         |

## Raw STRUCTURE output

The raw STRUCTURE output is also available as a tab-delimited text file (for use with Excel) [here](#).

| File name           | Run # | K | Est. Ln prob. of data | Mean value of Ln likelihood | Variance of Ln likelihood |
|---------------------|-------|---|-----------------------|-----------------------------|---------------------------|
| noLocPrior_run_20_f | 20    | 1 | -7185.8               | -7168.3                     | 35.0                      |

|                     |    |   |         |         |       |
|---------------------|----|---|---------|---------|-------|
| noLocPrior_run_18_f | 18 | 1 | -7185.7 | -7168.4 | 34.7  |
| noLocPrior_run_19_f | 19 | 1 | -7185.7 | -7168.3 | 34.7  |
| noLocPrior_run_3_f  | 3  | 1 | -7185.6 | -7168.3 | 34.6  |
| noLocPrior_run_8_f  | 8  | 1 | -7185.8 | -7168.3 | 35.0  |
| noLocPrior_run_13_f | 13 | 1 | -7185.8 | -7168.4 | 34.8  |
| noLocPrior_run_6_f  | 6  | 1 | -7185.8 | -7168.4 | 34.9  |
| noLocPrior_run_15_f | 15 | 1 | -7185.7 | -7168.3 | 34.8  |
| noLocPrior_run_5_f  | 5  | 1 | -7185.5 | -7168.3 | 34.4  |
| noLocPrior_run_14_f | 14 | 1 | -7186.0 | -7168.4 | 35.0  |
| noLocPrior_run_17_f | 17 | 1 | -7186.0 | -7168.4 | 35.1  |
| noLocPrior_run_2_f  | 2  | 1 | -7185.8 | -7168.3 | 34.9  |
| noLocPrior_run_11_f | 11 | 1 | -7185.8 | -7168.3 | 34.9  |
| noLocPrior_run_16_f | 16 | 1 | -7185.8 | -7168.3 | 34.8  |
| noLocPrior_run_12_f | 12 | 1 | -7186.6 | -7168.7 | 35.8  |
| noLocPrior_run_1_f  | 1  | 1 | -7185.8 | -7168.4 | 34.9  |
| noLocPrior_run_7_f  | 7  | 1 | -7186.2 | -7168.4 | 35.6  |
| noLocPrior_run_4_f  | 4  | 1 | -7185.7 | -7168.4 | 34.6  |
| noLocPrior_run_9_f  | 9  | 1 | -7185.6 | -7168.3 | 34.6  |
| noLocPrior_run_10_f | 10 | 1 | -7185.9 | -7168.4 | 35.1  |
| noLocPrior_run_21_f | 21 | 2 | -7031.2 | -6884.2 | 294.0 |
| noLocPrior_run_30_f | 30 | 2 | -7032.7 | -6884.0 | 297.2 |
| noLocPrior_run_27_f | 27 | 2 | -7031.4 | -6883.4 | 295.9 |
| noLocPrior_run_34_f | 34 | 2 | -7023.7 | -6882.6 | 282.1 |
| noLocPrior_run_39_f | 39 | 2 | -7029.9 | -6883.4 | 293.2 |
| noLocPrior_run_33_f | 33 | 2 | -7035.3 | -6884.2 | 302.2 |
| noLocPrior_run_24_f | 24 | 2 | -7033.4 | -6885.1 | 296.5 |
| noLocPrior_run_29_f | 29 | 2 | -7034.0 | -6884.3 | 299.5 |
| noLocPrior_run_32_f | 32 | 2 | -7028.4 | -6883.2 | 290.5 |
| noLocPrior_run_40_f | 40 | 2 | -7035.2 | -6885.4 | 299.7 |
| noLocPrior_run_31_f | 31 | 2 | -7030.2 | -6883.9 | 292.5 |
| noLocPrior_run_35_f | 35 | 2 | -7032.4 | -6883.7 | 297.4 |
| noLocPrior_run_37_f | 37 | 2 | -7027.3 | -6883.5 | 287.7 |
| noLocPrior_run_38_f | 38 | 2 | -7035.0 | -6883.7 | 302.5 |
| noLocPrior_run_26_f | 26 | 2 | -7031.6 | -6883.8 | 295.5 |
| noLocPrior_run_23_f | 23 | 2 | -7037.2 | -6884.9 | 304.6 |
| noLocPrior_run_25_f | 25 | 2 | -7033.3 | -6883.8 | 299.0 |
| noLocPrior_run_36_f | 36 | 2 | -7027.1 | -6882.7 | 288.6 |
| noLocPrior_run_22_f | 22 | 2 | -7033.7 | -6884.3 | 298.8 |
| noLocPrior_run_28_f | 28 | 2 | -7030.8 | -6884.0 | 293.5 |
| noLocPrior_run_46_f | 46 | 3 | -7050.2 | -6729.9 | 640.5 |
| noLocPrior_run_57_f | 57 | 3 | -7080.0 | -6735.3 | 689.5 |

|                      |     |   |         |         |        |
|----------------------|-----|---|---------|---------|--------|
| noLocPrior_run_58_f  | 58  | 3 | -7076.4 | -6739.2 | 674.3  |
| noLocPrior_run_54_f  | 54  | 3 | -7062.2 | -6737.0 | 650.3  |
| noLocPrior_run_50_f  | 50  | 3 | -7089.7 | -6739.4 | 700.5  |
| noLocPrior_run_43_f  | 43  | 3 | -7486.3 | -6754.1 | 1464.5 |
| noLocPrior_run_51_f  | 51  | 3 | -7081.7 | -6741.2 | 681.0  |
| noLocPrior_run_55_f  | 55  | 3 | -7063.4 | -6734.5 | 657.8  |
| noLocPrior_run_41_f  | 41  | 3 | -7064.4 | -6741.1 | 646.6  |
| noLocPrior_run_56_f  | 56  | 3 | -7092.9 | -6733.1 | 719.7  |
| noLocPrior_run_42_f  | 42  | 3 | -7099.7 | -6739.6 | 720.2  |
| noLocPrior_run_52_f  | 52  | 3 | -7071.2 | -6735.5 | 671.3  |
| noLocPrior_run_44_f  | 44  | 3 | -7074.8 | -6734.1 | 681.4  |
| noLocPrior_run_60_f  | 60  | 3 | -7071.4 | -6731.8 | 679.2  |
| noLocPrior_run_47_f  | 47  | 3 | -7119.2 | -6735.3 | 767.8  |
| noLocPrior_run_48_f  | 48  | 3 | -7078.5 | -6737.6 | 681.6  |
| noLocPrior_run_49_f  | 49  | 3 | -7327.4 | -6751.2 | 1152.4 |
| noLocPrior_run_45_f  | 45  | 3 | -7054.9 | -6739.5 | 630.8  |
| noLocPrior_run_53_f  | 53  | 3 | -7053.2 | -6743.6 | 619.2  |
| noLocPrior_run_59_f  | 59  | 3 | -7073.4 | -6735.5 | 675.9  |
| noLocPrior_run_79_f  | 79  | 4 | -6952.2 | -6579.6 | 745.2  |
| noLocPrior_run_67_f  | 67  | 4 | -7246.5 | -6647.3 | 1198.4 |
| noLocPrior_run_77_f  | 77  | 4 | -6949.0 | -6577.0 | 744.0  |
| noLocPrior_run_62_f  | 62  | 4 | -6971.2 | -6584.3 | 773.9  |
| noLocPrior_run_74_f  | 74  | 4 | -6966.7 | -6581.7 | 770.2  |
| noLocPrior_run_69_f  | 69  | 4 | -6975.4 | -6578.3 | 794.3  |
| noLocPrior_run_68_f  | 68  | 4 | -6964.9 | -6581.1 | 767.6  |
| noLocPrior_run_64_f  | 64  | 4 | -6995.6 | -6585.1 | 821.0  |
| noLocPrior_run_65_f  | 65  | 4 | -6954.8 | -6580.7 | 748.3  |
| noLocPrior_run_66_f  | 66  | 4 | -6971.2 | -6583.2 | 776.1  |
| noLocPrior_run_78_f  | 78  | 4 | -6978.5 | -6581.1 | 794.9  |
| noLocPrior_run_76_f  | 76  | 4 | -7009.5 | -6583.9 | 851.1  |
| noLocPrior_run_73_f  | 73  | 4 | -6938.4 | -6577.4 | 721.9  |
| noLocPrior_run_71_f  | 71  | 4 | -6943.0 | -6579.6 | 726.9  |
| noLocPrior_run_70_f  | 70  | 4 | -6947.2 | -6579.9 | 734.6  |
| noLocPrior_run_80_f  | 80  | 4 | -6970.1 | -6580.0 | 780.1  |
| noLocPrior_run_61_f  | 61  | 4 | -6970.1 | -6582.2 | 775.6  |
| noLocPrior_run_75_f  | 75  | 4 | -6960.8 | -6578.2 | 765.1  |
| noLocPrior_run_72_f  | 72  | 4 | -6964.8 | -6577.8 | 773.8  |
| noLocPrior_run_63_f  | 63  | 4 | -6959.9 | -6581.0 | 757.8  |
| noLocPrior_run_97_f  | 97  | 5 | -7100.2 | -6518.4 | 1163.6 |
| noLocPrior_run_86_f  | 86  | 5 | -6952.5 | -6527.0 | 851.0  |
| noLocPrior_run_100_f | 100 | 5 | -7109.1 | -6489.5 | 1239.1 |

|                      |     |   |         |         |        |
|----------------------|-----|---|---------|---------|--------|
| noLocPrior_run_84_f  | 84  | 5 | -6920.6 | -6478.4 | 884.4  |
| noLocPrior_run_98_f  | 98  | 5 | -6978.0 | -6483.9 | 988.2  |
| noLocPrior_run_93_f  | 93  | 5 | -7177.4 | -6494.2 | 1366.4 |
| noLocPrior_run_81_f  | 81  | 5 | -7065.8 | -6487.8 | 1156.0 |
| noLocPrior_run_90_f  | 90  | 5 | -6903.7 | -6480.0 | 847.4  |
| noLocPrior_run_87_f  | 87  | 5 | -6913.2 | -6478.4 | 869.7  |
| noLocPrior_run_95_f  | 95  | 5 | -6921.3 | -6477.7 | 887.2  |
| noLocPrior_run_83_f  | 83  | 5 | -6939.9 | -6480.0 | 919.9  |
| noLocPrior_run_99_f  | 99  | 5 | -6908.8 | -6477.4 | 862.7  |
| noLocPrior_run_92_f  | 92  | 5 | -6932.0 | -6480.1 | 903.7  |
| noLocPrior_run_85_f  | 85  | 5 | -6904.8 | -6476.9 | 855.8  |
| noLocPrior_run_91_f  | 91  | 5 | -7211.8 | -6498.5 | 1426.6 |
| noLocPrior_run_82_f  | 82  | 5 | -6916.4 | -6479.2 | 874.2  |
| noLocPrior_run_88_f  | 88  | 5 | -6883.2 | -6477.2 | 812.1  |
| noLocPrior_run_89_f  | 89  | 5 | -6939.4 | -6478.3 | 922.2  |
| noLocPrior_run_96_f  | 96  | 5 | -6914.4 | -6481.4 | 866.1  |
| noLocPrior_run_94_f  | 94  | 5 | -6919.6 | -6479.7 | 879.8  |
| noLocPrior_run_120_f | 120 | 6 | -7088.9 | -6386.2 | 1405.4 |
| noLocPrior_run_105_f | 105 | 6 | -7097.5 | -6389.4 | 1416.2 |
| noLocPrior_run_115_f | 115 | 6 | -7252.7 | -6398.1 | 1709.1 |
| noLocPrior_run_107_f | 107 | 6 | -6990.7 | -6381.8 | 1217.7 |
| noLocPrior_run_119_f | 119 | 6 | -6892.0 | -6377.8 | 1028.5 |
| noLocPrior_run_118_f | 118 | 6 | -7046.2 | -6386.9 | 1318.5 |
| noLocPrior_run_117_f | 117 | 6 | -6957.2 | -6442.1 | 1030.2 |
| noLocPrior_run_101_f | 101 | 6 | -7312.2 | -6426.8 | 1770.7 |
| noLocPrior_run_111_f | 111 | 6 | -6933.1 | -6380.3 | 1105.6 |
| noLocPrior_run_108_f | 108 | 6 | -6972.3 | -6443.2 | 1058.2 |
| noLocPrior_run_110_f | 110 | 6 | -7081.8 | -6384.2 | 1395.2 |
| noLocPrior_run_112_f | 112 | 6 | -6970.2 | -6379.5 | 1181.4 |
| noLocPrior_run_102_f | 102 | 6 | -6918.9 | -6376.3 | 1085.1 |
| noLocPrior_run_109_f | 109 | 6 | -7295.4 | -6396.3 | 1798.2 |
| noLocPrior_run_116_f | 116 | 6 | -7303.7 | -6423.9 | 1759.6 |
| noLocPrior_run_113_f | 113 | 6 | -7274.2 | -6425.1 | 1698.2 |
| noLocPrior_run_104_f | 104 | 6 | -7003.5 | -6380.8 | 1245.5 |
| noLocPrior_run_114_f | 114 | 6 | -7037.2 | -6386.3 | 1301.7 |
| noLocPrior_run_106_f | 106 | 6 | -7200.4 | -6435.6 | 1529.6 |
| noLocPrior_run_103_f | 103 | 6 | -7371.9 | -6399.3 | 1945.3 |
| noLocPrior_run_124_f | 124 | 7 | -6913.9 | -6358.6 | 1110.7 |
| noLocPrior_run_123_f | 123 | 7 | -7129.7 | -6355.7 | 1548.0 |
| noLocPrior_run_125_f | 125 | 7 | -7027.1 | -6352.3 | 1349.5 |
| noLocPrior_run_126_f | 126 | 7 | -6997.8 | -6355.1 | 1285.5 |

|                      |     |   |         |         |        |
|----------------------|-----|---|---------|---------|--------|
| noLocPrior_run_122_f | 122 | 7 | -6924.2 | -6365.3 | 1117.8 |
| noLocPrior_run_130_f | 130 | 7 | -7179.3 | -6334.9 | 1688.8 |
| noLocPrior_run_133_f | 133 | 7 | -7257.0 | -6341.5 | 1831.0 |
| noLocPrior_run_135_f | 135 | 7 | -6897.7 | -6363.1 | 1069.1 |
| noLocPrior_run_128_f | 128 | 7 | -6896.1 | -6359.2 | 1073.8 |
| noLocPrior_run_136_f | 136 | 7 | -7082.9 | -6355.9 | 1453.9 |
| noLocPrior_run_121_f | 121 | 7 | -7123.6 | -6352.9 | 1541.4 |
| noLocPrior_run_140_f | 140 | 7 | -6912.5 | -6359.7 | 1105.6 |
| noLocPrior_run_132_f | 132 | 7 | -6948.7 | -6363.5 | 1170.3 |
| noLocPrior_run_131_f | 131 | 7 | -7035.6 | -6349.9 | 1371.3 |
| noLocPrior_run_129_f | 129 | 7 | -6928.9 | -6360.9 | 1136.0 |
| noLocPrior_run_137_f | 137 | 7 | -7112.1 | -6354.0 | 1516.2 |
| noLocPrior_run_139_f | 139 | 7 | -7108.1 | -6345.6 | 1524.8 |
| noLocPrior_run_127_f | 127 | 7 | -7445.1 | -6325.4 | 2239.4 |
| noLocPrior_run_138_f | 138 | 7 | -7275.0 | -6342.7 | 1864.6 |
| noLocPrior_run_134_f | 134 | 7 | -7569.2 | -6330.1 | 2478.2 |
| noLocPrior_run_150_f | 150 | 8 | -6924.4 | -6294.9 | 1259.1 |
| noLocPrior_run_148_f | 148 | 8 | -7020.9 | -6286.2 | 1469.4 |
| noLocPrior_run_145_f | 145 | 8 | -7223.5 | -6280.3 | 1886.5 |
| noLocPrior_run_151_f | 151 | 8 | -6938.7 | -6294.1 | 1289.1 |
| noLocPrior_run_155_f | 155 | 8 | -7036.9 | -6282.1 | 1509.5 |
| noLocPrior_run_157_f | 157 | 8 | -7021.0 | -6283.5 | 1474.9 |
| noLocPrior_run_141_f | 141 | 8 | -7044.5 | -6283.9 | 1521.2 |
| noLocPrior_run_142_f | 142 | 8 | -6977.9 | -6294.0 | 1367.9 |
| noLocPrior_run_144_f | 144 | 8 | -6962.5 | -6286.9 | 1351.2 |
| noLocPrior_run_147_f | 147 | 8 | -7059.0 | -6278.9 | 1560.3 |
| noLocPrior_run_143_f | 143 | 8 | -7073.0 | -6287.5 | 1570.8 |
| noLocPrior_run_149_f | 149 | 8 | -7156.7 | -6288.3 | 1736.7 |
| noLocPrior_run_160_f | 160 | 8 | -6980.7 | -6291.9 | 1377.6 |
| noLocPrior_run_159_f | 159 | 8 | -7146.8 | -6272.7 | 1748.3 |
| noLocPrior_run_146_f | 146 | 8 | -7077.9 | -6284.1 | 1587.6 |
| noLocPrior_run_154_f | 154 | 8 | -6955.5 | -6300.3 | 1310.4 |
| noLocPrior_run_153_f | 153 | 8 | -6974.2 | -6291.2 | 1366.0 |
| noLocPrior_run_158_f | 158 | 8 | -6959.1 | -6296.8 | 1324.6 |
| noLocPrior_run_156_f | 156 | 8 | -6937.9 | -6299.1 | 1277.6 |
| noLocPrior_run_152_f | 152 | 8 | -7027.3 | -6295.3 | 1463.9 |
| noLocPrior_run_163_f | 163 | 9 | -7130.5 | -6229.9 | 1801.2 |
| noLocPrior_run_162_f | 162 | 9 | -6998.1 | -6243.4 | 1509.4 |
| noLocPrior_run_170_f | 170 | 9 | -7330.1 | -6247.5 | 2165.3 |
| noLocPrior_run_173_f | 173 | 9 | -7046.1 | -6251.1 | 1590.0 |
| noLocPrior_run_180_f | 180 | 9 | -7066.5 | -6246.3 | 1640.4 |



|                      |     |    |         |         |        |
|----------------------|-----|----|---------|---------|--------|
| noLocPrior_run_172_f | 172 | 9  | -7009.1 | -6246.9 | 1524.4 |
| noLocPrior_run_178_f | 178 | 9  | -6978.1 | -6243.7 | 1468.7 |
| noLocPrior_run_168_f | 168 | 9  | -7224.5 | -6227.7 | 1993.6 |
| noLocPrior_run_165_f | 165 | 9  | -7111.7 | -6255.7 | 1712.0 |
| noLocPrior_run_164_f | 164 | 9  | -7023.7 | -6244.1 | 1559.3 |
| noLocPrior_run_171_f | 171 | 9  | -7121.1 | -6245.0 | 1752.3 |
| noLocPrior_run_177_f | 177 | 9  | -6974.7 | -6249.2 | 1450.9 |
| noLocPrior_run_161_f | 161 | 9  | -7020.0 | -6243.6 | 1552.8 |
| noLocPrior_run_175_f | 175 | 9  | -7127.6 | -6242.8 | 1769.6 |
| noLocPrior_run_179_f | 179 | 9  | -7246.7 | -6254.2 | 1985.0 |
| noLocPrior_run_176_f | 176 | 9  | -7040.3 | -6249.9 | 1580.8 |
| noLocPrior_run_174_f | 174 | 9  | -6988.5 | -6243.6 | 1489.9 |
| noLocPrior_run_169_f | 169 | 9  | -7207.7 | -6238.0 | 1939.3 |
| noLocPrior_run_167_f | 167 | 9  | -7106.8 | -6234.8 | 1744.0 |
| noLocPrior_run_166_f | 166 | 9  | -7039.3 | -6244.8 | 1588.9 |
| noLocPrior_run_189_f | 189 | 10 | -7286.7 | -6207.0 | 2159.4 |
| noLocPrior_run_192_f | 192 | 10 | -7318.1 | -6206.8 | 2222.7 |
| noLocPrior_run_196_f | 196 | 10 | -7219.0 | -6189.5 | 2059.0 |
| noLocPrior_run_195_f | 195 | 10 | -7130.6 | -6203.1 | 1855.0 |
| noLocPrior_run_191_f | 191 | 10 | -7067.3 | -6204.2 | 1726.0 |
| noLocPrior_run_199_f | 199 | 10 | -7450.8 | -6203.3 | 2495.1 |
| noLocPrior_run_187_f | 187 | 10 | -7253.5 | -6204.4 | 2098.4 |
| noLocPrior_run_190_f | 190 | 10 | -7108.3 | -6198.5 | 1819.7 |
| noLocPrior_run_186_f | 186 | 10 | -7235.0 | -6197.8 | 2074.5 |
| noLocPrior_run_200_f | 200 | 10 | -7179.7 | -6195.3 | 1968.9 |
| noLocPrior_run_183_f | 183 | 10 | -7202.2 | -6203.2 | 1997.9 |
| noLocPrior_run_198_f | 198 | 10 | -7123.6 | -6192.3 | 1862.7 |
| noLocPrior_run_181_f | 181 | 10 | -7248.6 | -6207.4 | 2082.4 |
| noLocPrior_run_182_f | 182 | 10 | -7169.5 | -6190.9 | 1957.1 |
| noLocPrior_run_184_f | 184 | 10 | -7111.0 | -6197.0 | 1828.0 |
| noLocPrior_run_197_f | 197 | 10 | -7443.1 | -6202.6 | 2481.1 |
| noLocPrior_run_193_f | 193 | 10 | -7189.3 | -6187.8 | 2003.0 |
| noLocPrior_run_188_f | 188 | 10 | -7511.0 | -6194.4 | 2633.2 |
| noLocPrior_run_194_f | 194 | 10 | -7636.6 | -6197.4 | 2878.5 |
| noLocPrior_run_185_f | 185 | 10 | -7234.6 | -6199.3 | 2070.6 |

## CITATION

Earl, Dent A. and vonHoldt, Bridgett M. (2012)  
 STRUCTURE HARVESTER: a website and program for visualizing  
 STRUCTURE output and implementing the Evanno method.

Conservation Genetics Resources vol. 4 (2) pp. 359-361 doi: 10.1007/s12686-011-9548-7

Core version: vA.2 July 2014

Plot version: vA.1 November 2012

Web version: v0.6.94 July 2014

---

© Dent Earl 2007-2014
