# Supplementary material
Source: publisher figshare collection journal article supplement (https://tandf.figshare.com/articles/dataset/_/7210181)
Supplement: Supplementary file 3 [file 1]

# CLUMPAK main pipeline - Job 1535505827 summary

Major modes for the uploaded data:

K=2

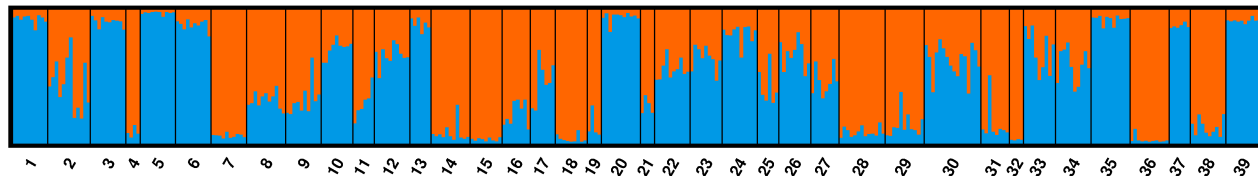

Minor modes for the uploaded data:

Division of runs by mode:

K=2 20/20
