# Supplementary material
Source: publisher figshare collection journal article supplement (https://tandf.figshare.com/articles/dataset/_/7210181)
Supplement: Supplementary file 4 [file 1]

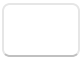

# Job ephemeral-violet-b5e3

This output file was generated at:

2018-Sep-17 19:12:25 PDT

**This document is not permanent.** It will automatically be removed from the server in seven (7) days. Please save or print it for your records. If images are missing, try reloading; this sometimes happens under heavy server load.

Single file archive including this page, all images, all clumpp files: [download](#). [.tar.gz]

## L(K)

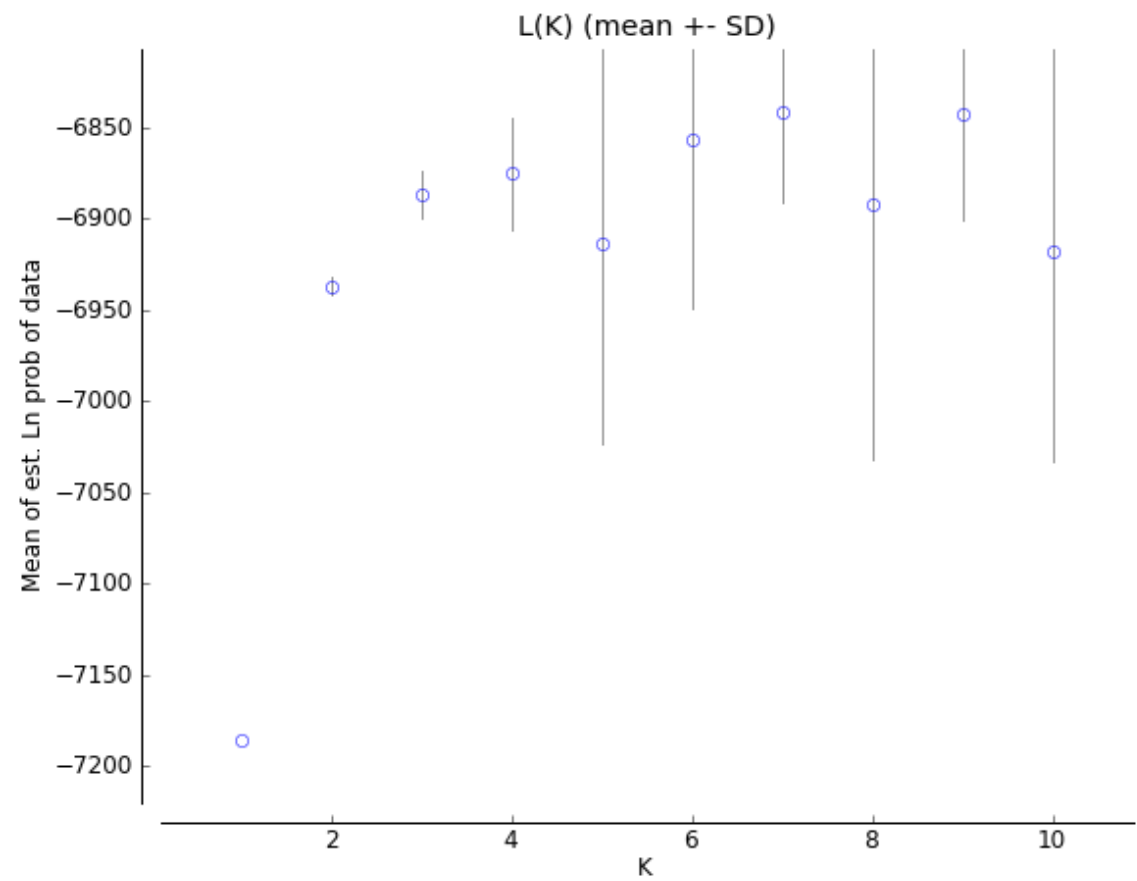

L(K): [pdf](#) [eps](#)

## Clumpp files

- [K = 1 Clumpp indfile](#)   [K = 1 Clumpp popfile](#)
- [K = 2 Clumpp indfile](#)   [K = 2 Clumpp popfile](#)
- [K = 3 Clumpp indfile](#)   [K = 3 Clumpp popfile](#)
- [K = 4 Clumpp indfile](#)   [K = 4 Clumpp popfile](#)

[K = 5 Clumpp indfile](#)   [K = 5 Clumpp popfile](#)  
[K = 6 Clumpp indfile](#)   [K = 6 Clumpp popfile](#)  
[K = 7 Clumpp indfile](#)   [K = 7 Clumpp popfile](#)  
[K = 8 Clumpp indfile](#)   [K = 8 Clumpp popfile](#)  
[K = 9 Clumpp indfile](#)   [K = 9 Clumpp popfile](#)  
[K = 10 Clumpp indfile](#)   [K = 10 Clumpp popfile](#)

---

## Evanno method

\*[Evanno et al., 2005. Molecular Ecology 14, 2611 - 2620](#). How are we calculating this? Look at the [FAQ](#).

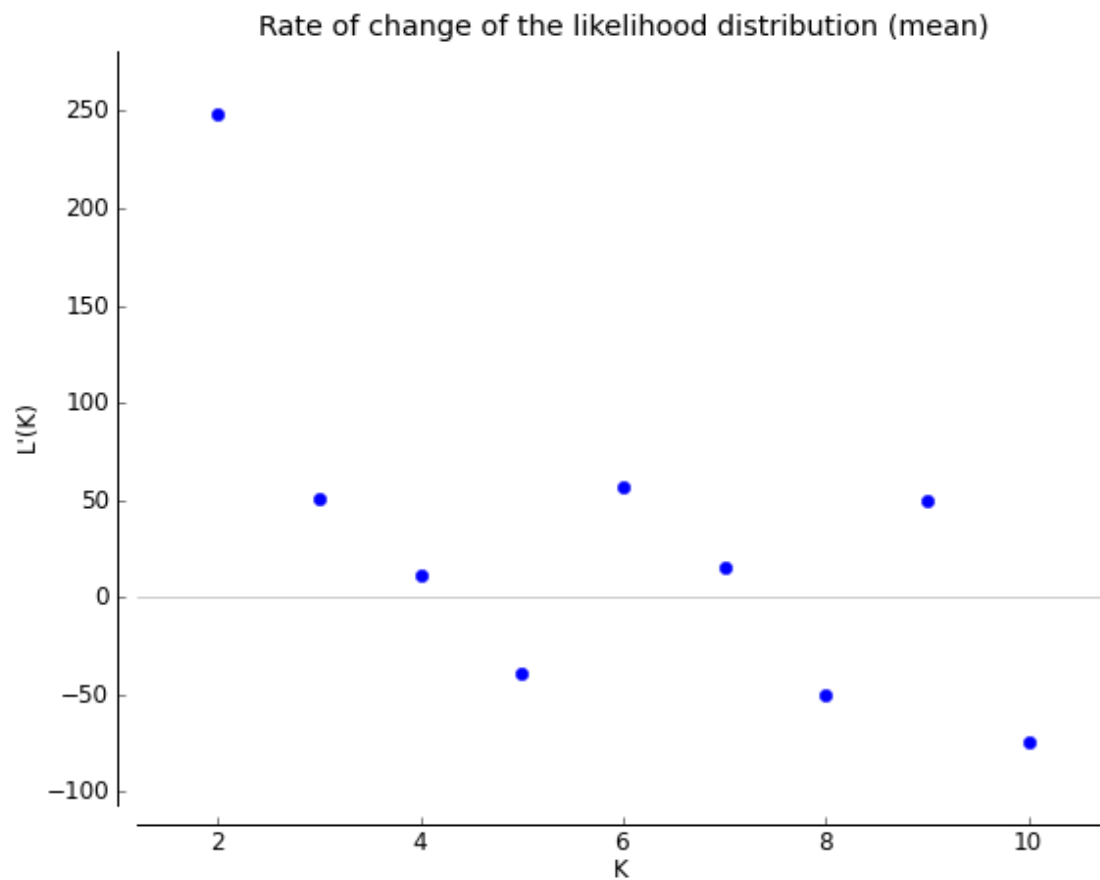

$L'(K)$ : [pdf](#) [eps](#)

---

Absolute value of the 2nd order rate of change of the likelihood distribution (mean)

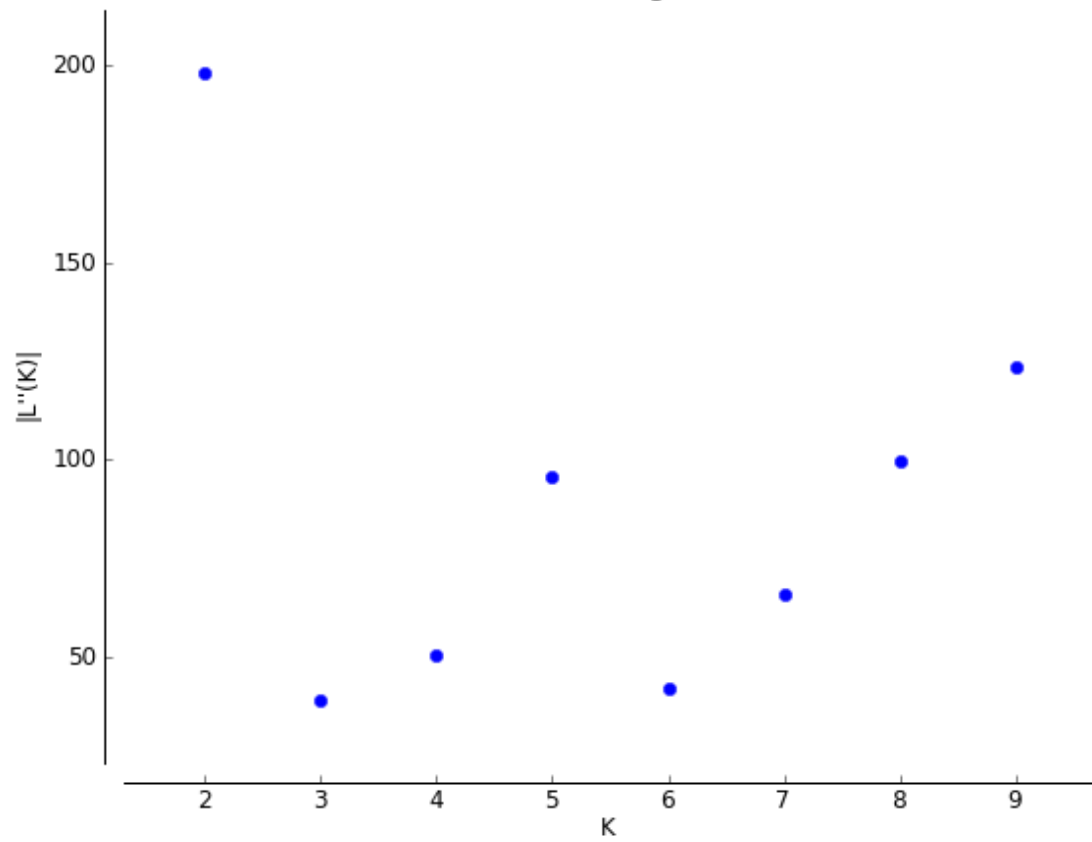

$|L''(K)|$ : [pdf](#) [eps](#)

---

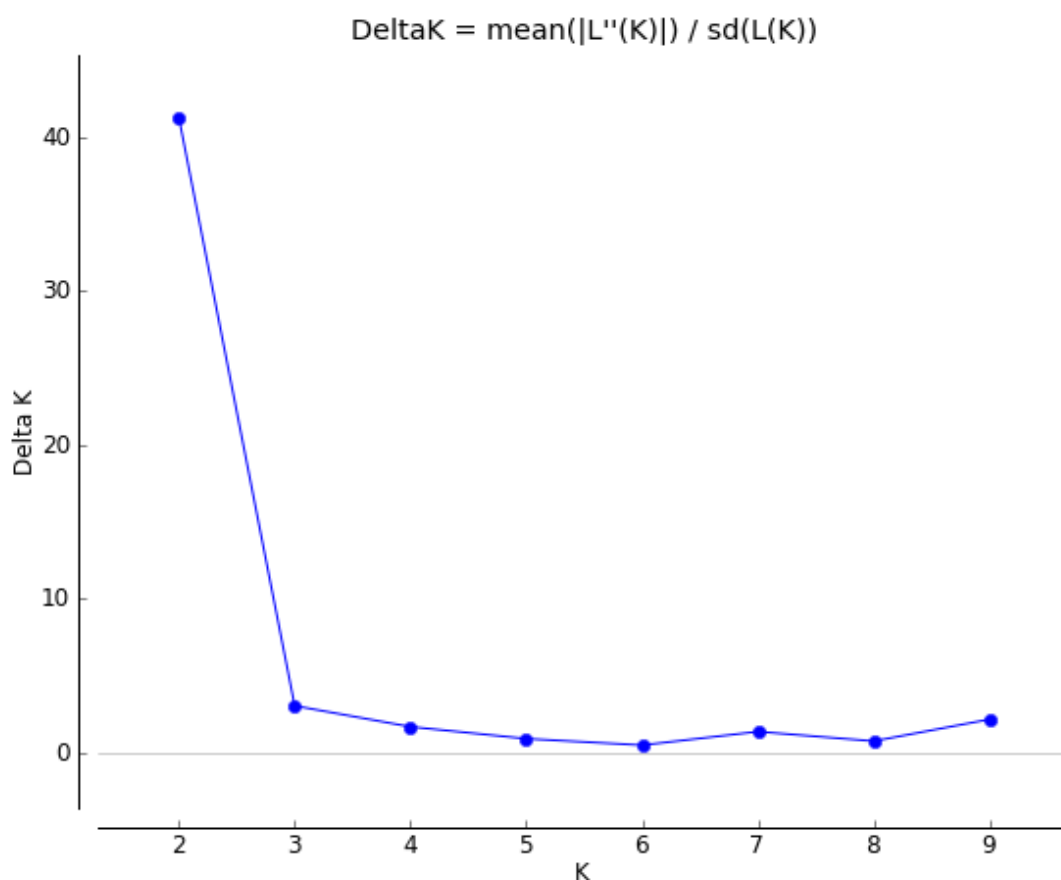

Delta K: [pdf](#) [eps](#)

The Evanno table output is also available as a tab-delimited text file (for use with Excel) [here](#).

| K  | Reps | Mean LnP(K)  | Stdev LnP(K) | Ln'(K)     | Ln''(K)    | Delta K   |
|----|------|--------------|--------------|------------|------------|-----------|
| 1  | 20   | -7185.780000 | 0.136111     | —          | —          | —         |
| 2  | 20   | -6937.350000 | 4.805534     | 248.430000 | 198.115000 | 41.226427 |
| 3  | 20   | -6887.035000 | 12.898522    | 50.315000  | 38.810000  | 3.008872  |
| 4  | 20   | -6875.530000 | 30.476481    | 11.505000  | 50.185000  | 1.646680  |
| 5  | 20   | -6914.210000 | 109.738665   | -38.680000 | 95.720000  | 0.872254  |
| 6  | 20   | -6857.170000 | 92.296810    | 57.040000  | 41.750000  | 0.452345  |
| 7  | 20   | -6841.880000 | 49.442956    | 15.290000  | 65.840000  | 1.331636  |
| 8  | 20   | -6892.430000 | 139.410745   | -50.550000 | 99.705000  | 0.715189  |
| 9  | 20   | -6843.275000 | 58.110529    | 49.155000  | 123.615000 | 2.127239  |
| 10 | 20   | -6917.735000 | 115.919965   | -74.460000 | —          | —         |

## Raw STRUCTURE output

The raw STRUCTURE output is also available as a tab-delimited text file (for use with Excel) [here](#).

| File name         | Run # | K | Est. Ln prob. of data | Mean value of Ln likelihood | Variance of Ln likelihood |
|-------------------|-------|---|-----------------------|-----------------------------|---------------------------|
| locprior_run_19_f | 19    | 1 | -7186.0               | -7168.4                     | 35.2                      |

|                   |    |   |         |         |       |
|-------------------|----|---|---------|---------|-------|
| locprior_run_11_f | 11 | 1 | -7185.6 | -7168.3 | 34.6  |
| locprior_run_5_f  | 5  | 1 | -7185.8 | -7168.3 | 34.9  |
| locprior_run_8_f  | 8  | 1 | -7185.7 | -7168.3 | 34.8  |
| locprior_run_3_f  | 3  | 1 | -7185.8 | -7168.3 | 34.9  |
| locprior_run_16_f | 16 | 1 | -7186.0 | -7168.4 | 35.3  |
| locprior_run_12_f | 12 | 1 | -7186.1 | -7168.4 | 35.3  |
| locprior_run_1_f  | 1  | 1 | -7185.7 | -7168.3 | 34.8  |
| locprior_run_10_f | 10 | 1 | -7185.8 | -7168.4 | 34.9  |
| locprior_run_7_f  | 7  | 1 | -7185.7 | -7168.3 | 34.8  |
| locprior_run_14_f | 14 | 1 | -7185.9 | -7168.4 | 35.0  |
| locprior_run_15_f | 15 | 1 | -7185.6 | -7168.4 | 34.5  |
| locprior_run_17_f | 17 | 1 | -7185.7 | -7168.3 | 34.7  |
| locprior_run_13_f | 13 | 1 | -7185.7 | -7168.4 | 34.8  |
| locprior_run_4_f  | 4  | 1 | -7185.7 | -7168.3 | 34.7  |
| locprior_run_18_f | 18 | 1 | -7185.7 | -7168.4 | 34.7  |
| locprior_run_6_f  | 6  | 1 | -7185.8 | -7168.3 | 35.0  |
| locprior_run_20_f | 20 | 1 | -7185.7 | -7168.3 | 34.8  |
| locprior_run_9_f  | 9  | 1 | -7185.7 | -7168.3 | 34.8  |
| locprior_run_2_f  | 2  | 1 | -7185.9 | -7168.4 | 35.1  |
| locprior_run_25_f | 25 | 2 | -6934.9 | -6855.0 | 159.9 |
| locprior_run_34_f | 34 | 2 | -6936.0 | -6855.2 | 161.7 |
| locprior_run_21_f | 21 | 2 | -6935.8 | -6858.0 | 155.6 |
| locprior_run_29_f | 29 | 2 | -6935.4 | -6857.1 | 156.5 |
| locprior_run_23_f | 23 | 2 | -6941.9 | -6856.2 | 171.3 |
| locprior_run_27_f | 27 | 2 | -6933.0 | -6856.5 | 153.0 |
| locprior_run_26_f | 26 | 2 | -6933.2 | -6855.0 | 156.2 |
| locprior_run_35_f | 35 | 2 | -6932.7 | -6854.7 | 156.0 |
| locprior_run_38_f | 38 | 2 | -6939.5 | -6857.7 | 163.6 |
| locprior_run_28_f | 28 | 2 | -6948.1 | -6862.8 | 170.5 |
| locprior_run_37_f | 37 | 2 | -6934.5 | -6853.8 | 161.4 |
| locprior_run_40_f | 40 | 2 | -6939.2 | -6858.5 | 161.5 |
| locprior_run_30_f | 30 | 2 | -6932.1 | -6857.9 | 148.3 |
| locprior_run_33_f | 33 | 2 | -6940.2 | -6857.8 | 164.8 |
| locprior_run_31_f | 31 | 2 | -6934.6 | -6857.2 | 154.9 |
| locprior_run_32_f | 32 | 2 | -6936.3 | -6857.1 | 158.4 |
| locprior_run_22_f | 22 | 2 | -6933.6 | -6854.5 | 158.2 |
| locprior_run_36_f | 36 | 2 | -6948.6 | -6870.4 | 156.6 |
| locprior_run_39_f | 39 | 2 | -6935.1 | -6857.4 | 155.3 |
| locprior_run_24_f | 24 | 2 | -6942.3 | -6860.0 | 164.6 |
| locprior_run_45_f | 45 | 3 | -6877.3 | -6723.2 | 308.2 |
| locprior_run_51_f | 51 | 3 | -6879.1 | -6735.2 | 287.8 |

|                   |    |   |         |         |       |
|-------------------|----|---|---------|---------|-------|
| locprior_run_47_f | 47 | 3 | -6884.4 | -6722.9 | 322.8 |
| locprior_run_43_f | 43 | 3 | -6890.7 | -6713.8 | 353.8 |
| locprior_run_58_f | 58 | 3 | -6903.3 | -6718.0 | 370.6 |
| locprior_run_52_f | 52 | 3 | -6869.9 | -6729.8 | 280.3 |
| locprior_run_42_f | 42 | 3 | -6874.4 | -6717.8 | 313.1 |
| locprior_run_55_f | 55 | 3 | -6877.0 | -6720.3 | 313.4 |
| locprior_run_60_f | 60 | 3 | -6878.8 | -6711.1 | 335.2 |
| locprior_run_46_f | 46 | 3 | -6892.3 | -6752.5 | 279.5 |
| locprior_run_48_f | 48 | 3 | -6894.3 | -6720.2 | 348.2 |
| locprior_run_59_f | 59 | 3 | -6905.8 | -6751.6 | 308.4 |
| locprior_run_49_f | 49 | 3 | -6887.5 | -6731.9 | 311.3 |
| locprior_run_56_f | 56 | 3 | -6886.0 | -6721.9 | 328.2 |
| locprior_run_53_f | 53 | 3 | -6920.1 | -6731.8 | 376.6 |
| locprior_run_41_f | 41 | 3 | -6901.3 | -6714.6 | 373.4 |
| locprior_run_57_f | 57 | 3 | -6875.1 | -6711.1 | 327.9 |
| locprior_run_54_f | 54 | 3 | -6889.1 | -6723.0 | 332.1 |
| locprior_run_50_f | 50 | 3 | -6873.7 | -6715.8 | 315.6 |
| locprior_run_44_f | 44 | 3 | -6880.6 | -6721.4 | 318.3 |
| locprior_run_75_f | 75 | 4 | -6892.8 | -6625.7 | 534.2 |
| locprior_run_70_f | 70 | 4 | -6937.0 | -6673.2 | 527.4 |
| locprior_run_79_f | 79 | 4 | -6839.2 | -6627.3 | 423.8 |
| locprior_run_64_f | 64 | 4 | -6845.6 | -6653.5 | 384.2 |
| locprior_run_63_f | 63 | 4 | -6863.9 | -6657.4 | 413.0 |
| locprior_run_62_f | 62 | 4 | -6869.6 | -6686.6 | 366.1 |
| locprior_run_66_f | 66 | 4 | -6874.1 | -6663.4 | 421.3 |
| locprior_run_80_f | 80 | 4 | -6860.7 | -6672.4 | 376.6 |
| locprior_run_74_f | 74 | 4 | -6849.5 | -6684.6 | 329.8 |
| locprior_run_77_f | 77 | 4 | -6882.1 | -6681.8 | 400.7 |
| locprior_run_68_f | 68 | 4 | -6945.0 | -6619.1 | 651.8 |
| locprior_run_69_f | 69 | 4 | -6854.5 | -6669.3 | 370.4 |
| locprior_run_61_f | 61 | 4 | -6888.2 | -6672.7 | 430.9 |
| locprior_run_65_f | 65 | 4 | -6828.4 | -6632.2 | 392.3 |
| locprior_run_71_f | 71 | 4 | -6881.1 | -6688.2 | 385.9 |
| locprior_run_78_f | 78 | 4 | -6900.3 | -6679.2 | 442.3 |
| locprior_run_73_f | 73 | 4 | -6893.2 | -6680.5 | 425.4 |
| locprior_run_76_f | 76 | 4 | -6897.6 | -6662.9 | 469.3 |
| locprior_run_72_f | 72 | 4 | -6843.6 | -6620.8 | 445.5 |
| locprior_run_67_f | 67 | 4 | -6864.2 | -6640.5 | 447.4 |
| locprior_run_81_f | 81 | 5 | -6896.0 | -6601.3 | 589.3 |
| locprior_run_98_f | 98 | 5 | -6872.2 | -6569.0 | 606.4 |
| locprior_run_87_f | 87 | 5 | -6872.5 | -6604.2 | 536.5 |

|                    |     |   |         |         |        |
|--------------------|-----|---|---------|---------|--------|
| locprior_run_83_f  | 83  | 5 | -6888.4 | -6567.5 | 641.9  |
| locprior_run_90_f  | 90  | 5 | -7188.0 | -6565.9 | 1244.1 |
| locprior_run_100_f | 100 | 5 | -6844.6 | -6561.0 | 567.1  |
| locprior_run_99_f  | 99  | 5 | -6880.6 | -6615.4 | 530.4  |
| locprior_run_91_f  | 91  | 5 | -6801.6 | -6558.1 | 487.1  |
| locprior_run_85_f  | 85  | 5 | -6956.0 | -6590.2 | 731.6  |
| locprior_run_94_f  | 94  | 5 | -6934.6 | -6579.6 | 710.0  |
| locprior_run_92_f  | 92  | 5 | -6839.4 | -6601.9 | 475.1  |
| locprior_run_86_f  | 86  | 5 | -7034.0 | -6571.5 | 924.9  |
| locprior_run_96_f  | 96  | 5 | -6853.1 | -6554.2 | 597.8  |
| locprior_run_89_f  | 89  | 5 | -7189.5 | -6564.4 | 1250.3 |
| locprior_run_84_f  | 84  | 5 | -6968.3 | -6630.7 | 675.2  |
| locprior_run_88_f  | 88  | 5 | -6836.3 | -6581.6 | 509.3  |
| locprior_run_97_f  | 97  | 5 | -6792.0 | -6548.5 | 487.0  |
| locprior_run_93_f  | 93  | 5 | -6902.9 | -6564.3 | 677.2  |
| locprior_run_95_f  | 95  | 5 | -6850.3 | -6616.4 | 467.8  |
| locprior_run_82_f  | 82  | 5 | -6883.9 | -6555.7 | 656.4  |
| locprior_run_116_f | 116 | 6 | -6946.8 | -6475.7 | 942.1  |
| locprior_run_102_f | 102 | 6 | -6797.6 | -6520.1 | 555.1  |
| locprior_run_108_f | 108 | 6 | -6841.6 | -6567.2 | 548.8  |
| locprior_run_115_f | 115 | 6 | -6860.3 | -6546.9 | 626.7  |
| locprior_run_119_f | 119 | 6 | -6798.3 | -6453.5 | 689.6  |
| locprior_run_112_f | 112 | 6 | -6809.8 | -6542.6 | 534.4  |
| locprior_run_114_f | 114 | 6 | -6840.6 | -6544.1 | 593.1  |
| locprior_run_117_f | 117 | 6 | -6794.9 | -6453.4 | 683.0  |
| locprior_run_118_f | 118 | 6 | -6806.0 | -6495.9 | 620.2  |
| locprior_run_109_f | 109 | 6 | -6792.1 | -6530.3 | 523.6  |
| locprior_run_113_f | 113 | 6 | -6817.9 | -6520.6 | 594.5  |
| locprior_run_101_f | 101 | 6 | -6988.1 | -6487.7 | 1000.8 |
| locprior_run_104_f | 104 | 6 | -6828.1 | -6485.6 | 684.9  |
| locprior_run_110_f | 110 | 6 | -6932.1 | -6485.1 | 894.1  |
| locprior_run_105_f | 105 | 6 | -6825.4 | -6538.6 | 573.6  |
| locprior_run_103_f | 103 | 6 | -6826.6 | -6486.5 | 680.4  |
| locprior_run_106_f | 106 | 6 | -6793.4 | -6491.7 | 603.4  |
| locprior_run_120_f | 120 | 6 | -7172.8 | -6492.3 | 1361.0 |
| locprior_run_107_f | 107 | 6 | -6807.3 | -6552.9 | 508.7  |
| locprior_run_111_f | 111 | 6 | -6863.7 | -6505.2 | 717.0  |
| locprior_run_121_f | 121 | 7 | -6870.9 | -6487.8 | 766.2  |
| locprior_run_137_f | 137 | 7 | -6960.8 | -6482.3 | 956.9  |
| locprior_run_126_f | 126 | 7 | -6858.2 | -6473.5 | 769.5  |
| locprior_run_128_f | 128 | 7 | -6830.9 | -6444.3 | 773.2  |

|                    |     |   |         |         |        |
|--------------------|-----|---|---------|---------|--------|
| locprior_run_129_f | 129 | 7 | -6799.2 | -6446.8 | 704.8  |
| locprior_run_140_f | 140 | 7 | -6819.5 | -6492.4 | 654.2  |
| locprior_run_134_f | 134 | 7 | -6826.1 | -6475.0 | 702.3  |
| locprior_run_133_f | 133 | 7 | -6768.7 | -6488.6 | 560.3  |
| locprior_run_135_f | 135 | 7 | -6811.0 | -6486.0 | 650.1  |
| locprior_run_123_f | 123 | 7 | -6912.7 | -6437.1 | 951.1  |
| locprior_run_131_f | 131 | 7 | -6777.7 | -6487.4 | 580.4  |
| locprior_run_124_f | 124 | 7 | -6864.7 | -6464.4 | 800.5  |
| locprior_run_132_f | 132 | 7 | -6828.4 | -6451.8 | 753.1  |
| locprior_run_139_f | 139 | 7 | -6875.5 | -6458.2 | 834.6  |
| locprior_run_130_f | 130 | 7 | -6884.9 | -6476.8 | 816.0  |
| locprior_run_125_f | 125 | 7 | -6787.6 | -6471.2 | 632.6  |
| locprior_run_122_f | 122 | 7 | -6875.1 | -6494.5 | 761.3  |
| locprior_run_136_f | 136 | 7 | -6875.0 | -6463.0 | 824.0  |
| locprior_run_138_f | 138 | 7 | -6777.4 | -6494.3 | 566.1  |
| locprior_run_127_f | 127 | 7 | -6833.3 | -6460.8 | 745.0  |
| locprior_run_155_f | 155 | 8 | -6977.4 | -6436.7 | 1081.3 |
| locprior_run_143_f | 143 | 8 | -6884.7 | -6398.1 | 973.2  |
| locprior_run_145_f | 145 | 8 | -7363.0 | -6415.8 | 1894.4 |
| locprior_run_159_f | 159 | 8 | -6816.7 | -6432.5 | 768.4  |
| locprior_run_150_f | 150 | 8 | -6821.5 | -6450.8 | 741.3  |
| locprior_run_160_f | 160 | 8 | -6792.0 | -6435.1 | 713.8  |
| locprior_run_154_f | 154 | 8 | -6847.0 | -6438.9 | 816.2  |
| locprior_run_144_f | 144 | 8 | -6833.5 | -6395.9 | 875.2  |
| locprior_run_152_f | 152 | 8 | -7092.8 | -6434.8 | 1316.0 |
| locprior_run_149_f | 149 | 8 | -6976.9 | -6453.9 | 1046.0 |
| locprior_run_147_f | 147 | 8 | -6873.1 | -6427.3 | 891.6  |
| locprior_run_158_f | 158 | 8 | -6799.9 | -6420.2 | 759.4  |
| locprior_run_153_f | 153 | 8 | -6743.4 | -6411.9 | 662.9  |
| locprior_run_156_f | 156 | 8 | -6917.4 | -6444.3 | 946.2  |
| locprior_run_142_f | 142 | 8 | -6783.9 | -6420.2 | 727.5  |
| locprior_run_148_f | 148 | 8 | -6911.9 | -6412.5 | 998.7  |
| locprior_run_151_f | 151 | 8 | -6752.1 | -6453.2 | 597.8  |
| locprior_run_146_f | 146 | 8 | -6929.0 | -6390.6 | 1076.8 |
| locprior_run_141_f | 141 | 8 | -6849.6 | -6440.1 | 819.1  |
| locprior_run_157_f | 157 | 8 | -6882.8 | -6449.6 | 866.3  |
| locprior_run_169_f | 169 | 9 | -6769.9 | -6385.5 | 768.8  |
| locprior_run_177_f | 177 | 9 | -6810.1 | -6364.4 | 891.4  |
| locprior_run_164_f | 164 | 9 | -6768.1 | -6352.6 | 831.0  |
| locprior_run_170_f | 170 | 9 | -6822.5 | -6387.9 | 869.2  |
| locprior_run_167_f | 167 | 9 | -6953.3 | -6408.3 | 1089.9 |



|                    |     |    |         |         |        |
|--------------------|-----|----|---------|---------|--------|
| locprior_run_172_f | 172 | 9  | -6803.3 | -6379.7 | 847.4  |
| locprior_run_179_f | 179 | 9  | -6854.5 | -6362.4 | 984.3  |
| locprior_run_161_f | 161 | 9  | -6915.3 | -6394.8 | 1041.0 |
| locprior_run_162_f | 162 | 9  | -6839.2 | -6428.6 | 821.4  |
| locprior_run_176_f | 176 | 9  | -6892.8 | -6400.3 | 985.1  |
| locprior_run_180_f | 180 | 9  | -6882.4 | -6361.7 | 1041.3 |
| locprior_run_168_f | 168 | 9  | -6845.9 | -6434.3 | 823.2  |
| locprior_run_163_f | 163 | 9  | -6801.1 | -6413.0 | 776.3  |
| locprior_run_174_f | 174 | 9  | -6740.5 | -6393.5 | 694.0  |
| locprior_run_178_f | 178 | 9  | -6914.5 | -6398.1 | 1032.7 |
| locprior_run_166_f | 166 | 9  | -6873.6 | -6413.7 | 919.9  |
| locprior_run_173_f | 173 | 9  | -6918.7 | -6371.7 | 1094.0 |
| locprior_run_175_f | 175 | 9  | -6822.2 | -6401.8 | 840.7  |
| locprior_run_165_f | 165 | 9  | -6856.9 | -6355.5 | 1002.8 |
| locprior_run_171_f | 171 | 9  | -6780.7 | -6396.0 | 769.5  |
| locprior_run_191_f | 191 | 10 | -7206.3 | -6310.8 | 1791.1 |
| locprior_run_187_f | 187 | 10 | -6827.8 | -6356.7 | 942.3  |
| locprior_run_200_f | 200 | 10 | -6990.9 | -6399.8 | 1182.2 |
| locprior_run_190_f | 190 | 10 | -7020.2 | -6378.7 | 1282.9 |
| locprior_run_181_f | 181 | 10 | -6865.0 | -6322.9 | 1084.2 |
| locprior_run_183_f | 183 | 10 | -6800.4 | -6355.9 | 889.1  |
| locprior_run_199_f | 199 | 10 | -7047.7 | -6356.2 | 1382.9 |
| locprior_run_188_f | 188 | 10 | -6846.3 | -6332.8 | 1027.0 |
| locprior_run_197_f | 197 | 10 | -6816.6 | -6371.3 | 890.6  |
| locprior_run_194_f | 194 | 10 | -7013.5 | -6347.0 | 1332.9 |
| locprior_run_192_f | 192 | 10 | -6850.8 | -6340.7 | 1020.3 |
| locprior_run_198_f | 198 | 10 | -6942.8 | -6340.2 | 1205.3 |
| locprior_run_189_f | 189 | 10 | -6851.4 | -6349.6 | 1003.7 |
| locprior_run_193_f | 193 | 10 | -6778.9 | -6413.0 | 731.8  |
| locprior_run_184_f | 184 | 10 | -6967.6 | -6336.9 | 1261.5 |
| locprior_run_195_f | 195 | 10 | -6914.3 | -6378.0 | 1072.6 |
| locprior_run_182_f | 182 | 10 | -6828.4 | -6352.3 | 952.2  |
| locprior_run_196_f | 196 | 10 | -6773.3 | -6418.7 | 709.3  |
| locprior_run_185_f | 185 | 10 | -7091.0 | -6325.1 | 1531.9 |
| locprior_run_186_f | 186 | 10 | -6921.5 | -6377.9 | 1087.2 |

## CITATION

Earl, Dent A. and vonHoldt, Bridgett M. (2012)  
 STRUCTURE HARVESTER: a website and program for visualizing  
 STRUCTURE output and implementing the Evanno method.

Conservation Genetics Resources vol. 4 (2) pp. 359-361 doi: 10.1007/s12686-011-9548-7

Core version: vA.2 July 2014

Plot version: vA.1 November 2012

Web version: v0.6.94 July 2014

---

© Dent Earl 2007-2014
