# Supplementary material
Source: publisher figshare collection journal article supplement (https://tandf.figshare.com/articles/dataset/_/7210181)
Supplement: Supplementary file 5 [file 1]

# CLUMPAK main pipeline - Job 1535490847 summary

Major modes for the uploaded data:

K=1

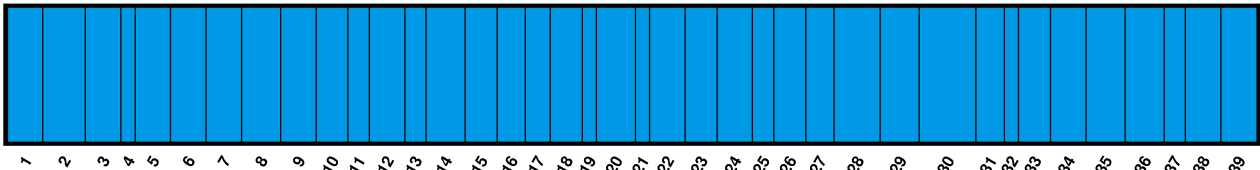

K=2

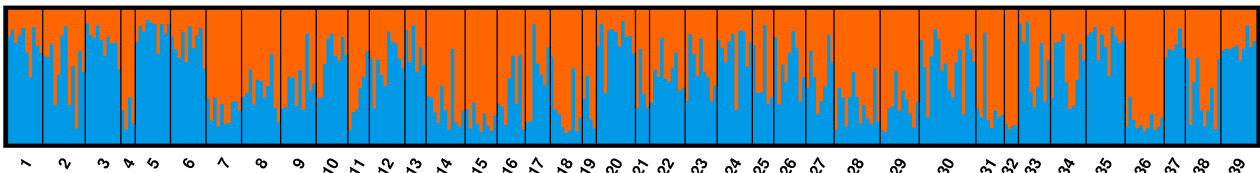

K=3

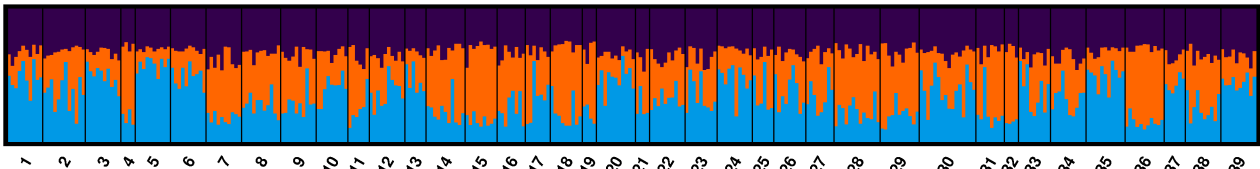

K=4

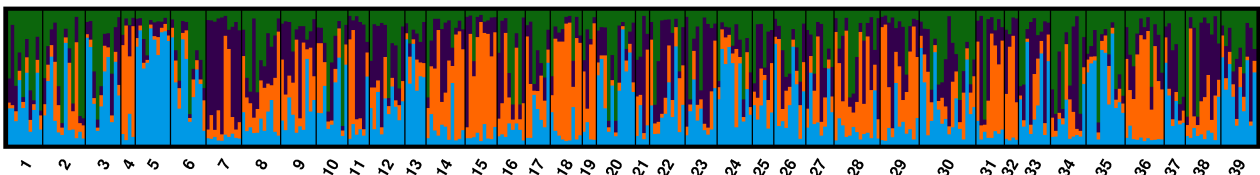

K=5

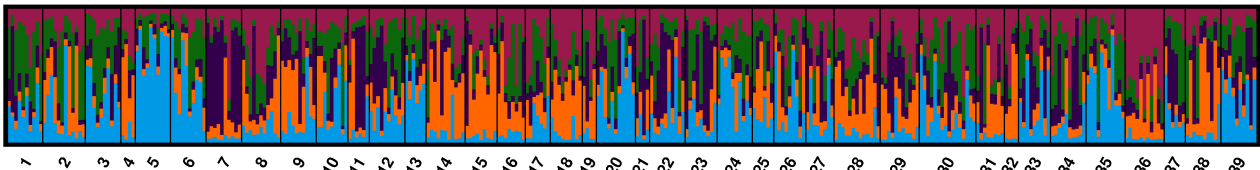

K=6

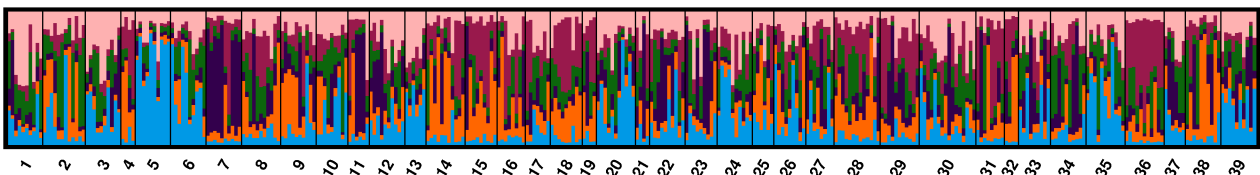

K=7

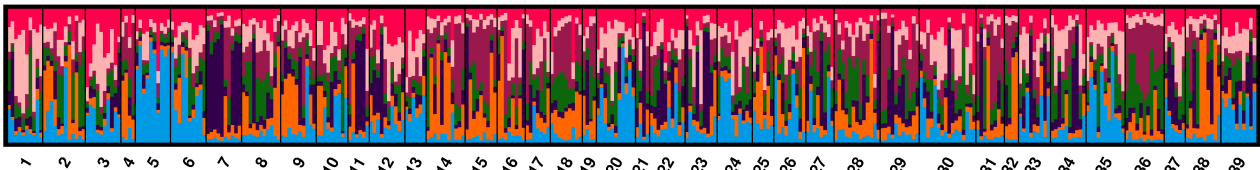

K=8

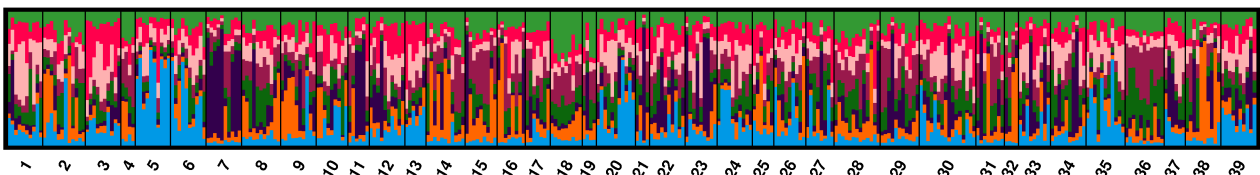

K=9

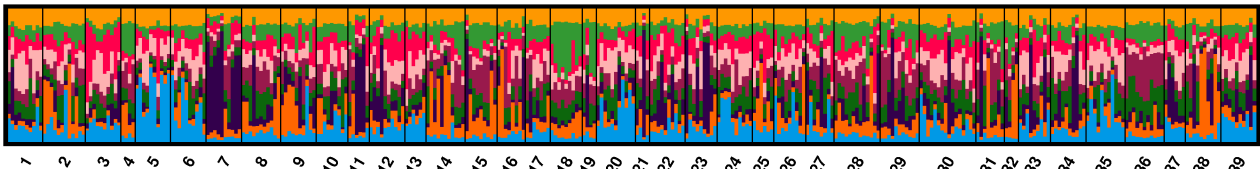

K=10

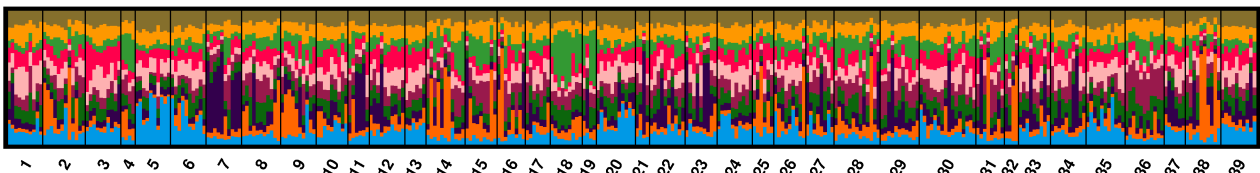

Minor modes for the uploaded data:

Division of runs by mode:

|      |       |
|------|-------|
| K=1  | 20/20 |
| K=2  | 20/20 |
| K=3  | 20/20 |
| K=4  | 20/20 |
| K=5  | 20/20 |
| K=6  | 20/20 |
| K=7  | 20/20 |
| K=8  | 20/20 |
| K=9  | 20/20 |
| K=10 | 20/20 |
